# Supplementary material for: Origin and structure of polar domains in doped molecular crystals
Source: PubMed Central journal article supplement (PMC5105173; doi:10.1038/ncomms13351), 2016-11-08
Supplement: ncomms13351-s1.pdf [file ncomms13351-s1.pdf]

1

## Supplementary Figures

a

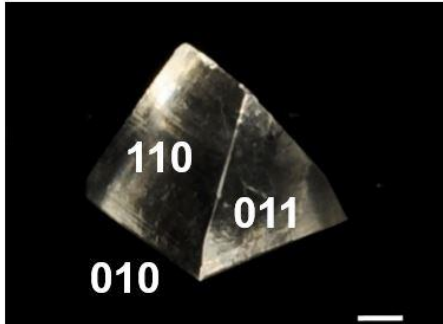

b

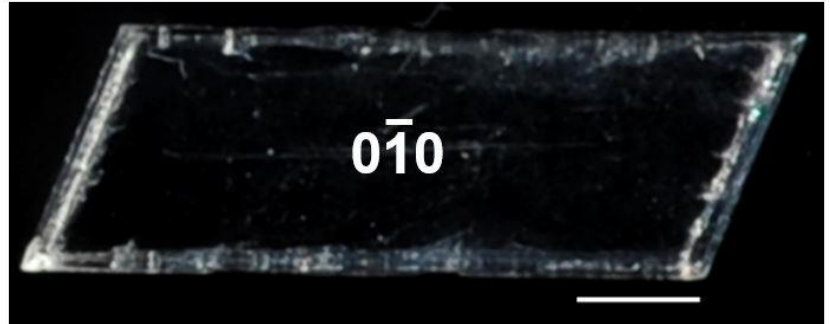

2  
3 **Supplementary Figure 1 | Photographs of the amino acid crystals.** (a) Pure crystal of  $\alpha$ -glycine where the  $(0\bar{1}0)$  face develops at the solution/glass interface (represents the base of the pyramid). (b)  $\alpha$ -glycine doped with  $\sim 0.3\%$  of *L*-amino acid. Scale bars, 1 mm.

6

a

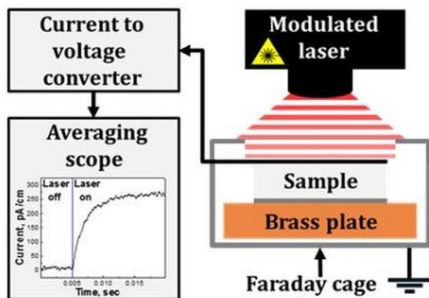

b

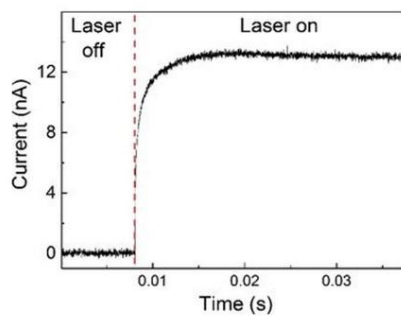

c

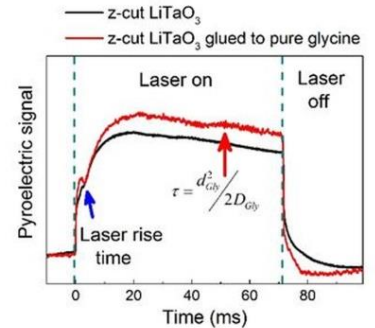

7  
8 **Supplementary Figure 2 | Pyroelectric measurement.** (a) Schematic illustration of the periodic  
9 temperature change technique. (b) Pyroelectric signal from a homogenous polar crystal. (c) Pyroelectric  
10 current of  $\text{LiTaO}_3$  glued with pure  $\alpha$ -glycine crystal.

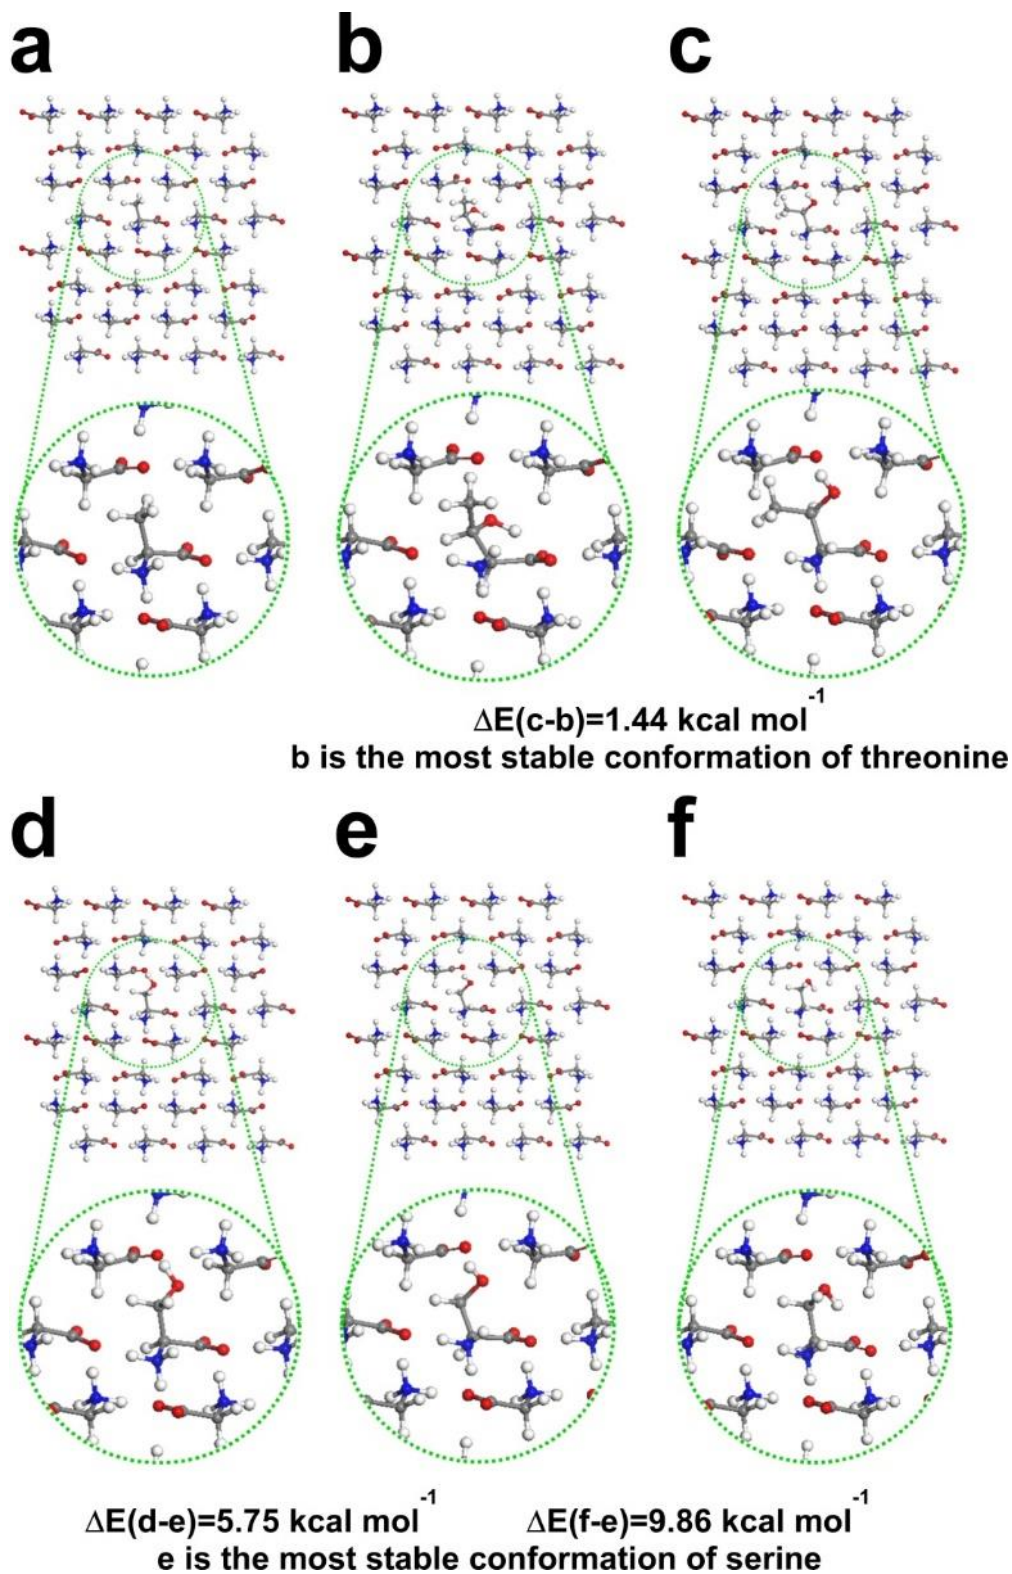

11  
 12 **Supplementary Figure 3 | Metastable conformations of the guest and the arrangement of the host**  
 13 **glycine molecules in the vicinity of the guest site. (a)  $\alpha$ -Glycine doped with 0.78% *L*-alanine**  
 14 **(Supplementary Software File 1), (b) and (c) with *L*-threonine (Supplementary Software Files 2 and 3),**  
 15 **(d), (e) and (f) with *L*-serine (Supplementary Software Files 4, 5 and 6).**

**a**

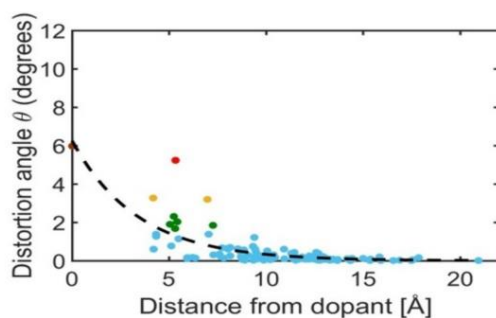

**b**

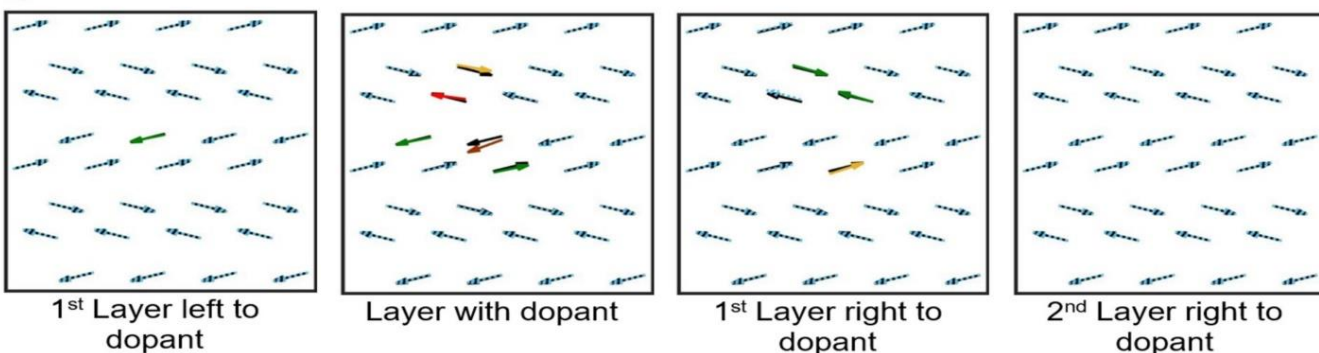

16

17 **Supplementary Figure 4 | Distortion of the molecules in the super cell, induced by 0.78% L-alanine**  
18 **to the  $\alpha$ -glycine crystal. (a)** Distortion angle as function of the distance from the  $\alpha$ -carbon of the dopant  
19 **to the  $\alpha$ -carbon of the host molecules. The colors represent the degree of distortion angle due to the**  
20 **presence of the dopant. The dopant is colored by brown dot. (b)** 2D Deflection graphs of the  
21 **C(carboxylic)-N vector relative to the undoped crystal. The brown arrow represents the dopant molecule.**

**a**

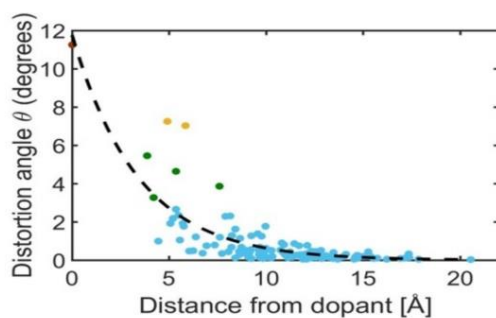

**b**

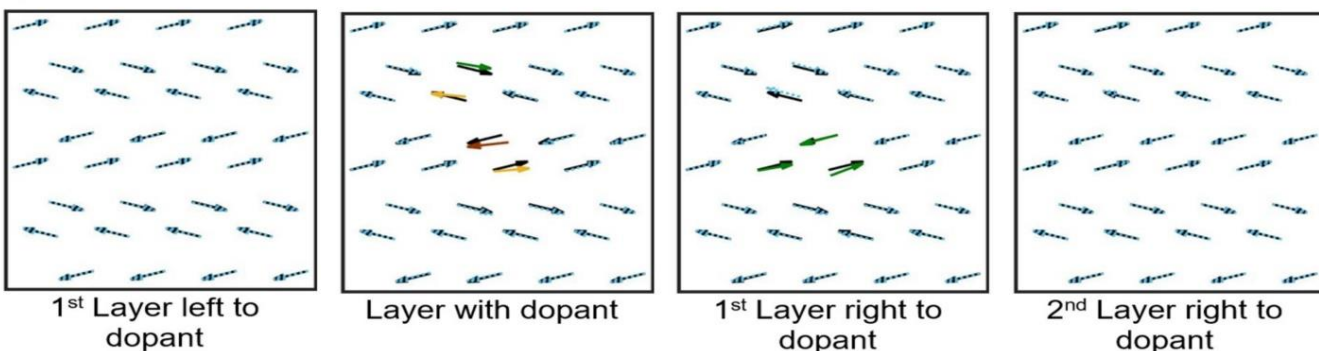

22  
23 **Supplementary Figure 5 | Distortion of the molecules in the super cell, induced by 0.78% L-**  
24 **threonine to the  $\alpha$ -glycine crystal.** (a) Distortion angle as function of the distance from the  $\alpha$ -carbon of  
25 the dopant to the  $\alpha$ -carbon of the host molecules. The colors represent the degree of distortion angle due  
26 to the presence of the dopant. The dopant is colored by brown dot. (b) 2D Deflection graphs of the  
27 C(carboxylic)-N vector relative to the undoped crystal. The brown arrow represents the dopant molecule.

**a**

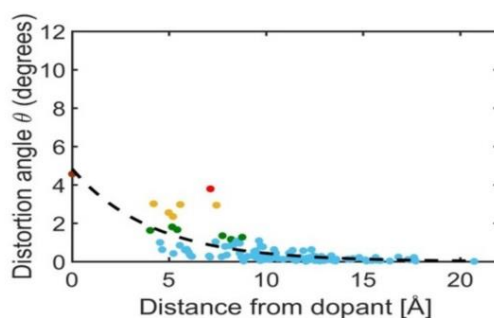

**b**

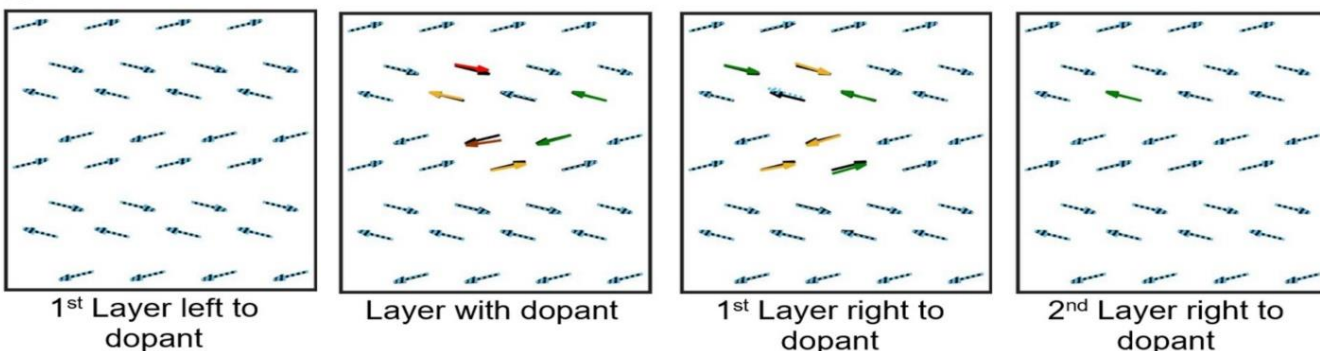

28  
29 **Supplementary Figure 6 | Distortion of the molecules in the super cell, induced by 0.78% L-serine**  
30 **to the  $\alpha$ -glycine crystal.** (a) Distortion angle as function of the distance from the  $\alpha$ -carbon of the dopant  
31 to the  $\alpha$ -carbon of the host molecules. The colors represent the degree of distortion angle due to the  
32 presence of the dopant. The dopant is colored by brown dot. (b) 2D Deflection graphs of the  
33 C(carboxylic)-N vector relative to the undoped crystal. The brown arrow represents the dopant molecule.

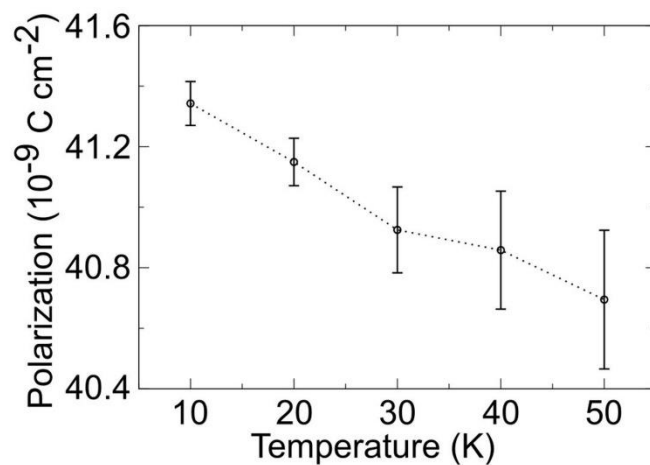

34  
35 **Supplementary Figure 7 | MD-computed temperature-dependent polarization for the configuration**  
36 **of serine with an intra-molecular H-bond.** The dots are average values and the error bars represent  
37 the SD.

## Supplementary Tables

38

39

40 **Supplementary Table 1 | Pyroelectric coefficient at 25 °C as function of dopant concentration.**

| Face Measured     | Alanine Doped Glycine                |                                                                | Threonine Doped Glycine                |                                                                | Serine Doped Glycine                |                                                                |
|-------------------|--------------------------------------|----------------------------------------------------------------|----------------------------------------|----------------------------------------------------------------|-------------------------------------|----------------------------------------------------------------|
|                   | Alanine Conc. [wt wt <sup>-1</sup> ] | Pyroelectric Coefficient [C K <sup>-1</sup> cm <sup>-2</sup> ] | Threonine Conc. [wt wt <sup>-1</sup> ] | Pyroelectric Coefficient [C K <sup>-1</sup> cm <sup>-2</sup> ] | Serine Conc. [wt wt <sup>-1</sup> ] | Pyroelectric Coefficient [C K <sup>-1</sup> cm <sup>-2</sup> ] |
| <b>Top</b>        | 0.32%                                | -10.9×10 <sup>-12</sup>                                        | 0.32%                                  | -12.6×10 <sup>-12</sup>                                        | 0.32%                               | 11.0×10 <sup>-12</sup>                                         |
| <b>Cleaved #1</b> | 0.11%                                | -4.5×10 <sup>-12</sup>                                         | 0.12%                                  | -4.6×10 <sup>-12</sup>                                         | 0.14%                               | 2.9×10 <sup>-12</sup>                                          |
| <b>Cleaved #2</b> | 0.09%                                | -3.8×10 <sup>-12</sup>                                         | 0.10%                                  | -3.7×10 <sup>-12</sup>                                         | 0.10%                               | 2.1×10 <sup>-12</sup>                                          |

41 The top surface of the crystal is enriched with dopant, while upon cleaving a more homogeneous mixed  
 42 crystal is revealed.

43

44 **Supplementary Table 2 | Polarization contributions along the *b*-axis from MD simulations at 0 K.**

| Unit (10 <sup>-9</sup> C cm <sup>-2</sup> ) | Guest Polarization Contribution | Host Polarization Contribution |
|---------------------------------------------|---------------------------------|--------------------------------|
| Alanine                                     | 29.80                           | -9.72                          |
| Threonine                                   | 46.47                           | 31.98                          |
| Serine                                      | -23.36                          | 84.44                          |

45

## Supplementary Discussion

57 **Crystal growth.** A supersaturated solution (130%) of glycine with the dopant was prepared by dissolving  
58 the amino acids in water (Ultra-pure Millipore water, 18.2 M $\Omega$  cm at 25 °C, Millipore Synergy UV, Type  
59 1 water) and heating it to ~80 °C, allowing for full dissolution. The solutions were filtered through cotton  
60 wool into glass crystallization growth dishes which were covered with filter paper for allowing slow  
61 evaporation. Large transparent single crystals were chosen, washed in water, and dried. The crystalline  
62 structure was verified and major faces were indexed using an Ultima-III (sealed X-ray tube, Cu anode, 3  
63 kW, RIGAKU, Japan) X-ray diffractometer. The {010} faces in the pure glycine crystal developed at the  
64 glass-water interface since no mass transfer of solute molecules was possible to the surface of the growing  
65 crystal that was directly in contact with the glass. The doped crystals exhibit plate-like morphology with  
66 0.5-1 mm thickness and a 0.05-0.2 cm<sup>2</sup> area of the top surface ( $0\bar{1}0$ ) (Supplementary Figure 1). All  
67 crystals were heated to 100 °C for 2 hours in order to remove the surface pyroelectric signal, originating  
68 from the wetted surfaces of the crystals<sup>1</sup>.

69 **HPLC determination of the dopant concentration.** The pure glycine crystal was free from other amino  
70 acids. The concentration of the dopant as function of the depth was determined by pyroelectric and HPLC  
71 (high pressure liquid chromatography) measurements on crystalline segments, cleaved perpendicular to  
72 the polar *b*-axis. The cleaved segments were diluted in 1 ml of water (Ultra-pure Millipore water, 18.2  
73 M $\Omega$  cm at 25 °C, Millipore Synergy UV, Type 1 water), filtered, diluted  $\times 10$ , and subjected to amino  
74 acid analysis. The analysis was performed on a Waters Alliance 2695 Instrument, equipped with a Waters  
75 Milford Mass 474 fluorescence detector, using the Waters Milford Mass AccQ-Tag amino acids analysis  
76 kit. The column was AccQ-Tag, reversed phase, 150 $\times$ 3.9 mm. The samples were reacted for fluorescence  
77 detection with an AccQ-Tag Analysis kit. The concentration of the guest molecules was within the range  
78 0.03-0.3% wt wt<sup>-1</sup>. For (*L*-) alanine, threonine, allo-threonine and serine, the dopant concentration was  
79  $\approx 0.3\%$  wt wt<sup>-1</sup>, and for phenylalanine, tyrosine and glutamic acid 0.03-0.06% wt wt<sup>-1</sup>. The HPLC analysis  
80 of the cleaved-off parts confirmed that the dopant content decreases with depth. The pyroelectric current  
81 measured after each cleave was correspondingly lower, proportionally to the decrease in the dopant  
82 concentration, for  $\alpha$ -glycine doped with alanine, threonine and serine (Supplementary Table 1). In the  
83 case of tyrosine, phenylalanine, and glutamic acid, the dopant was detected only in the segments residing  
84 within  $\sim 100$ -200  $\mu$ m from the top surface.

85 **Pyroelectric measurement.** The pyroelectric current of the mixed crystal was measured by the periodic  
86 temperature change technique<sup>2</sup> (Chynoweth method (Supplementary Figure 2a)). Once the sample starts  
87 losing heat to its substrate, the current starts to decay. Therefore, if the heating time is shorter than the  
88 thermal diffusion time through a homogeneous crystal, the current will remain constant as a function of  
89 time (Supplementary Figure 2b). For further information, see Appendix 2e in ref. 2. The top contact was  
90 completely opaque, providing heat entrance exclusively by thermal diffusion through the surface.

91 **Estimation of the heat diffusion coefficient of  $\alpha$ -glycine.** The heat diffusion coefficient, *D*, can be  
92 calculated from the pyroelectric current, *J*<sup>3</sup>. Here we estimate this value using similar logic. The current  
93 is proportional to the temperature change with time<sup>2</sup>:  $J = a \cdot \partial T / \partial t$ , where *a* is the pyroelectric coefficient.  
94 The derivative of the temperature with respect to time is<sup>4</sup>:



95

$$(S1) \quad \frac{\partial T}{\partial t} = \frac{F_d}{C\sqrt{\pi Dt}} \cdot \exp\left(-\frac{x^2}{4Dt}\right),$$

96 where  $F_d$  is the heat flux at the surface and  $C$  is the thermal capacitance per unit volume. In order to  
 97 calculate the heat diffusion coefficient of  $\alpha$ -glycine crystal, we measured the pyroelectric current of a  
 98 well-known polar material (z-cut LiTaO<sub>3</sub>) after gluing a pure  $\alpha$ -glycine crystal (which is not pyroelectric)  
 99 to the top surface of the LiTaO<sub>3</sub> crystal. The current should reach to its maximum value when

100  $t \equiv \tau = \frac{d_{\text{Gly}}^2}{2D_{\text{Gly}}}$  (Supplementary Figure 2c) where  $d=0.022$  cm is the thickness of the  $\alpha$ -glycine crystal.

101 The heat diffusion coefficient of  $\alpha$ -glycine according to this measurement is  $D \sim 0.05$  cm<sup>2</sup>/s.

102 **Modelling using Dispersion-Corrected DFT.** We provided different initial geometries for the guest  
 103 molecules (*L*-alanine, *L*-serine, and *L*-threonine) in the ideal host crystal, and relaxed the overall structure.  
 104 The calculations showed one locally stable conformation for alanine, two for threonine and three for serine  
 105 (see Supplementary Figure 3 and Supplementary Software Files 1-6 for details). The angular distortion  
 106 that the dopant induces to its neighboring glycine molecules is represented in Supplementary Figure 4, 5  
 107 and 6.

108 We used the lowest-energy conformation of each host-guest structure for calculating the polarization  
 109 and the pyroelectric coefficient. The polarization at different temperatures was calculated by the Berry  
 110 Phase method<sup>5</sup>. In the modern theory of polarization<sup>5</sup>, it is recognized that the polarization of a periodic  
 111 solid cannot be extracted from the charge density in the density in the unit cell but is instead a property of  
 112 the wave functions. In a periodic cell, the position operator  $\mathbf{r}$  is not well-defined and so the polarization is  
 113 calculated as the expectation value of  $d/dk$ ; this makes the polarization a Berry's phase in momentum  
 114 space. In this study we focus on polarization along the  $b$  axis,  $P_b$ . The polarization component along a  
 115 lattice vector is defined modulo a polarization quantum,  $P_Q=e/S$ , where  $e$  is the electron charge and  $S$  is  
 116 the surface area of the unit cell bounded by  $\mathbf{a}$  and  $\mathbf{c}$ ,  $S=\mathbf{a}\times\mathbf{c}\cdot\mathbf{b}/b$ , where  $b=|\mathbf{b}|$ <sup>5,6</sup>. When calculating quantities  
 117 involving polarization differences, the polarization quanta must be handled with care. For systems  
 118 involving continuous change, the polarization should change continuously as well, enabling unambiguous  
 119 calculation of differences.

120 Here, when polarization is calculated with different lattice vector lengths and temperature-dependent  
 121  $S(T)$ , the polarization quantum itself,  $P_Q(T)$ , changes and the customary cancellation of quanta must be  
 122 generalized. For calculated  $P(T)$  the polarization can be  $P(T)+nP_Q(T)$ , where  $n$  is the polarization quantum.  
 123 In the experiment, the sample rests for a long time at a particular temperature  $T_0$ , long enough for it to  
 124 gather a compensating charge per unit cell of  $Q=-[P(T_0)+nP_Q(T_0)]S(T_0)=-P(T_0)S(T_0)-ne$  on its boundaries.  
 125 Thus, at  $T_0$  the total (bound polarization plus compensating) charge is zero. Then, the temperature is  
 126 changed, changing the polarization and the axis lengths. At temperature  $T$ , the total surface charge per cell  
 127 is  $[P(T)+nP_Q(T)]S(T)+Q=P(T)S(T)-P(T_0)S(T_0)$ . This makes the total polarization  $P(T)-P(T_0)S(T_0)/S(T)$ ,  
 128 including bound and compensating charges. Differentiating this expression yields the pyroelectric  
 129 coefficient:

130

$$(S2) \quad \alpha = \frac{dP(T)}{dT} + \frac{P(T_0)S(T_0)}{S^2(T)} \cdot \frac{dS(T)}{dT}$$

131 This expression includes the change in the bulk polarization as lattice parameters are changed owing  
 132 to temperature, as well as account for the change in compensating charge density brought about solely by  
 133 deforming the unit cell.

134

135 **Supplementary References**

- 136 1. Piperno, S. et al. Water-Induced Pyroelectricity from Nonpolar Crystals of Amino Acids. *Angewandte*  
137 *Chemie-International Edition* **52**, 6513-6516 (2013).
- 138 2. Lubomirsky, I. & Stafsudd, O. Practical guide for pyroelectric measurements. *Rev. Sci. Instrum.* **83**, 051101  
139 (2012).
- 140 3. Muensit, S. & Lang, S.B. Pyroelectric technique for measurement of thermal diffusivity of thin solid  
141 materials. *Ferroelectrics* **293**, 341-350 (2003).
- 142 4. Ehre, D., Mirzadeh, E., Stafsudd, O. & Lubomirsky, I. Pyroelectric Measurement of Surface Layer: The Case  
143 of Thin Film on Dielectric Substrate. *Ferroelectrics* **472**, 41-49 (2014).
- 144 5. Resta, R. & Vanderbilt, D. Theory of polarization: A modern approach. *Physics of Ferroelectrics: A Modern*  
145 *Perspective* **105**, 31-68 (2007).
- 146 6. Djani, H., Bousquet, E., Kellou, A. & Ghosez, P. First-principles study of the ferroelectric Aurivillius phase  
147 Bi<sub>2</sub>WO<sub>6</sub>. *Phys. Rev. B* **86**, 054107 (2012).
